# Supplementary figures and images for: Repulsive Sema3E-Plexin-D1 signaling coordinates both axonal extension and steering via activating an autoregulatory factor, Mtss1
Source: eLife journal article supplement (doi:10.7554/elife.96891), 2024-03-25

Figure 1 – source data 1 (panel D)

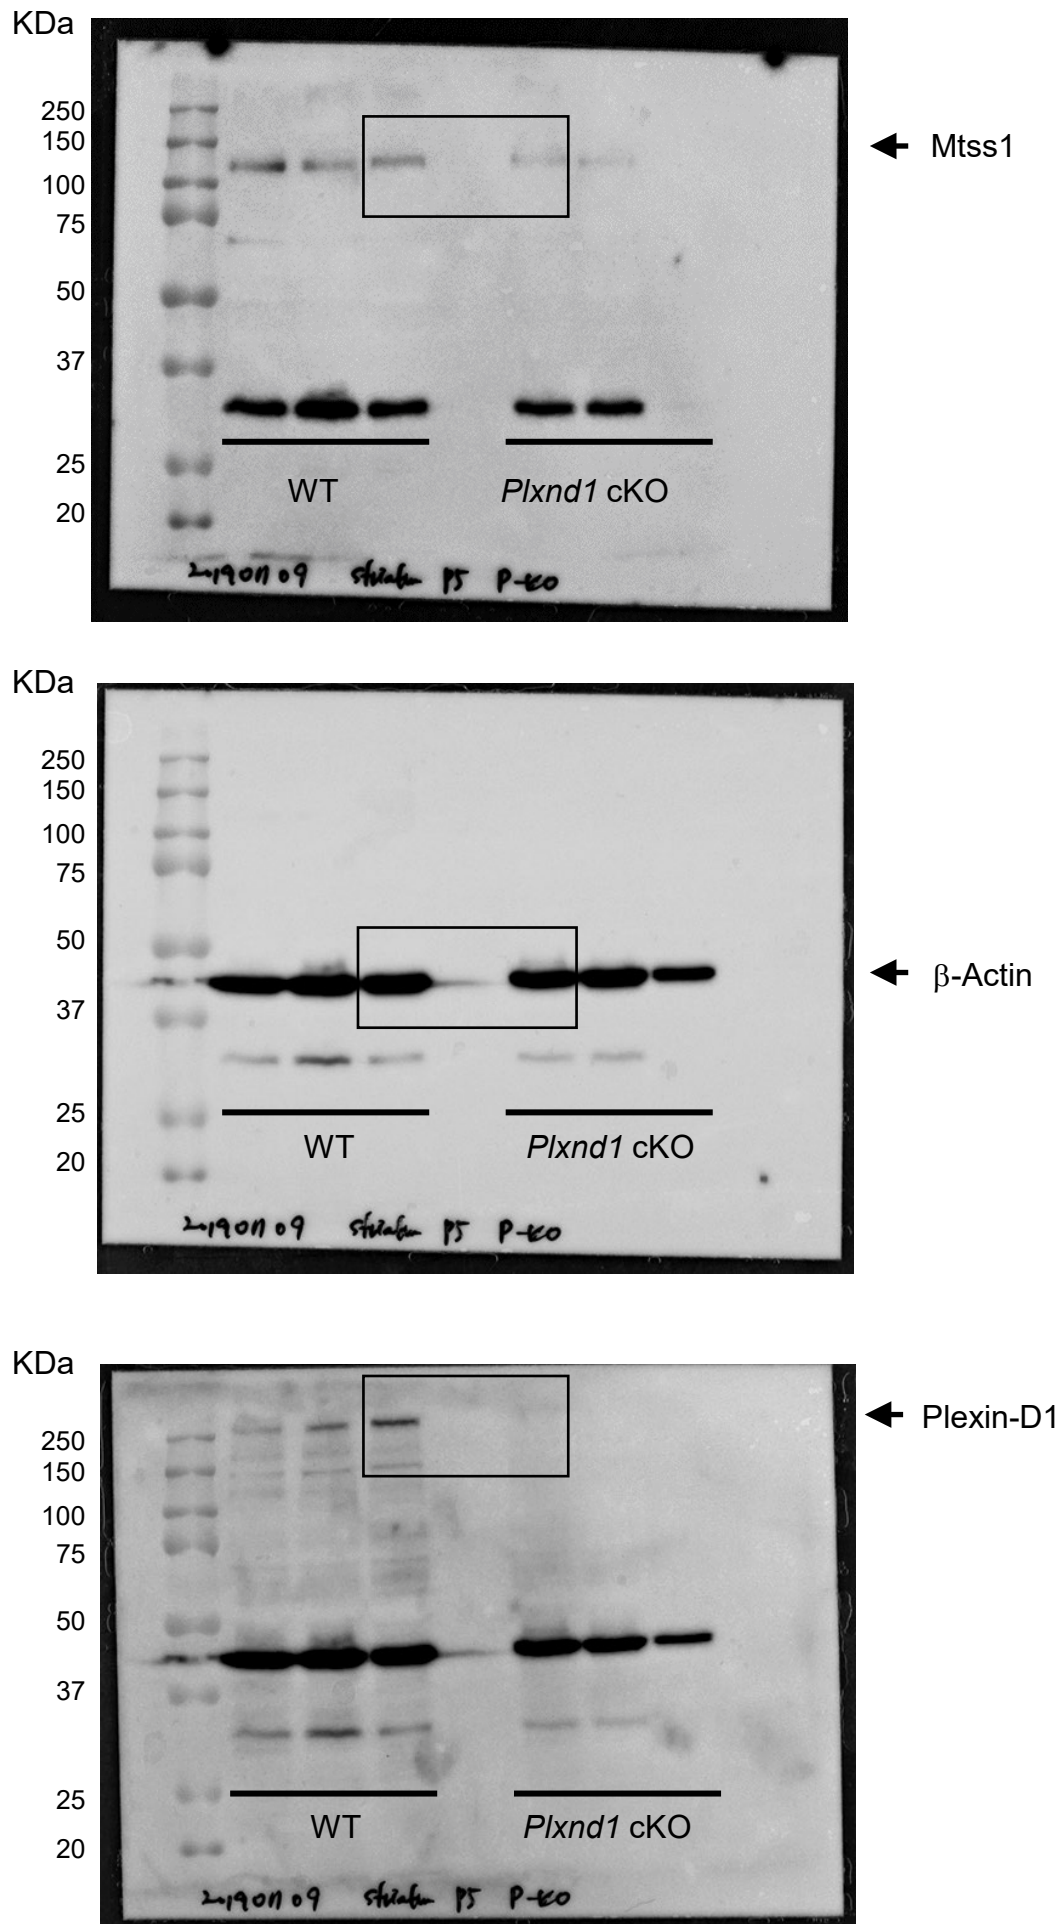

Supplement: fig1-data1 [file elife-96891-fig1-data1-v2.zip]

Figure 1 – source data 1 (panel F)

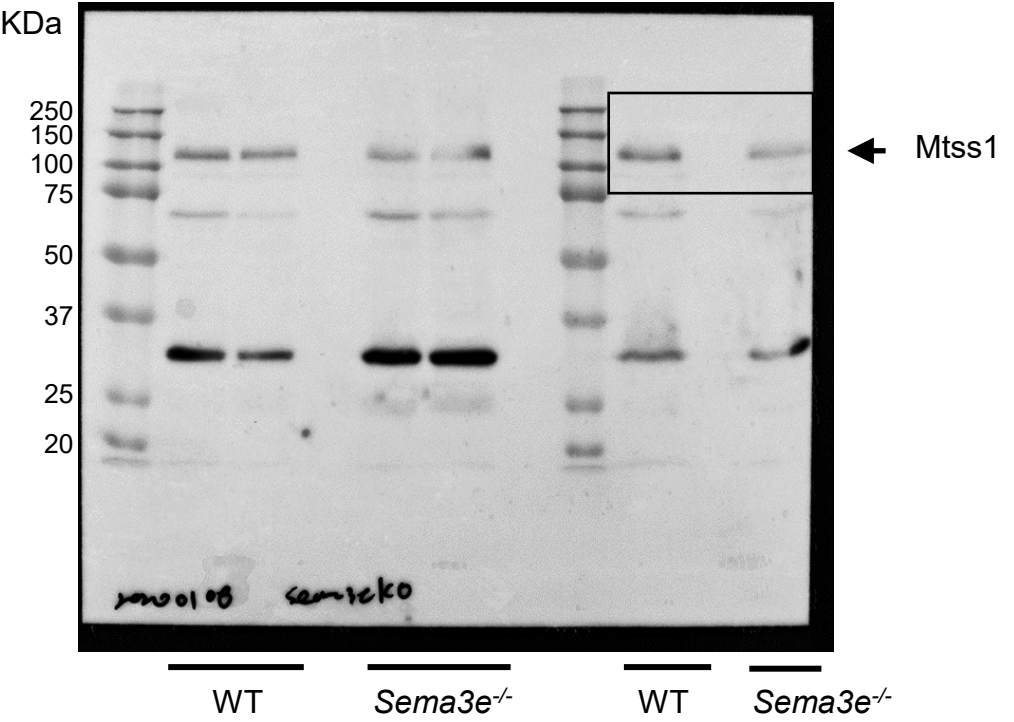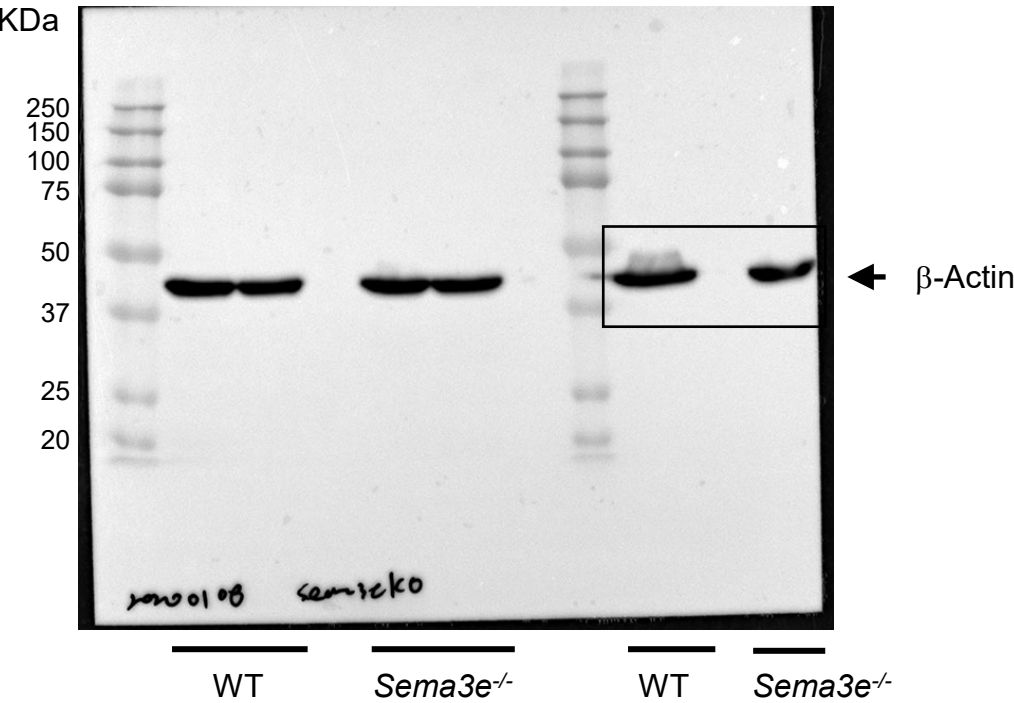

Supplement: fig1-data1 [file elife-96891-fig1-data1-v2.zip]

Figure 1 – source data 1 (panel M)

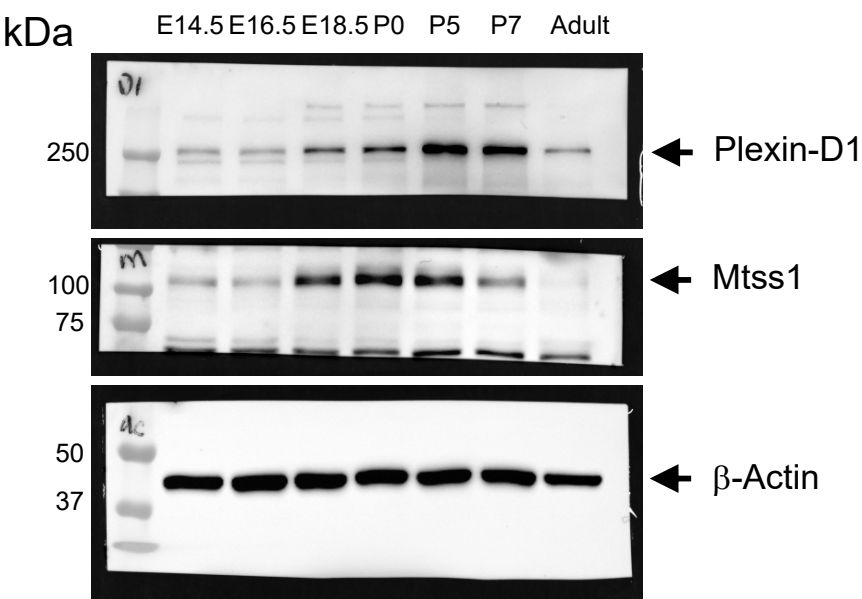

Supplement: fig1-data1 [file elife-96891-fig1-data1-v2.zip]

Figure 1 – source data 1 (panel K)

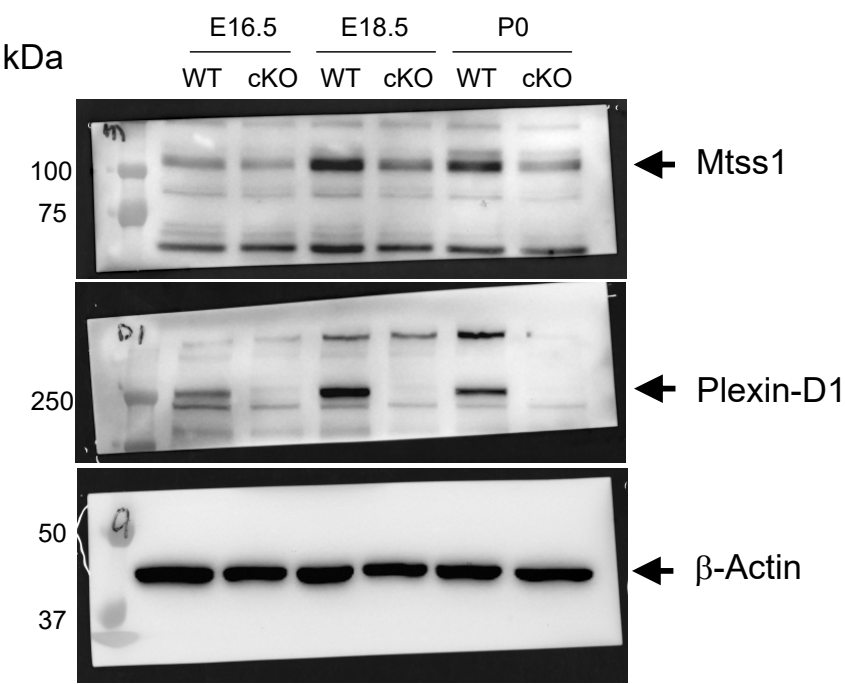

Supplement: fig1-data1 [file elife-96891-fig1-data1-v2.zip]

Supplementary Figure 1 – source data 1 (panel B)

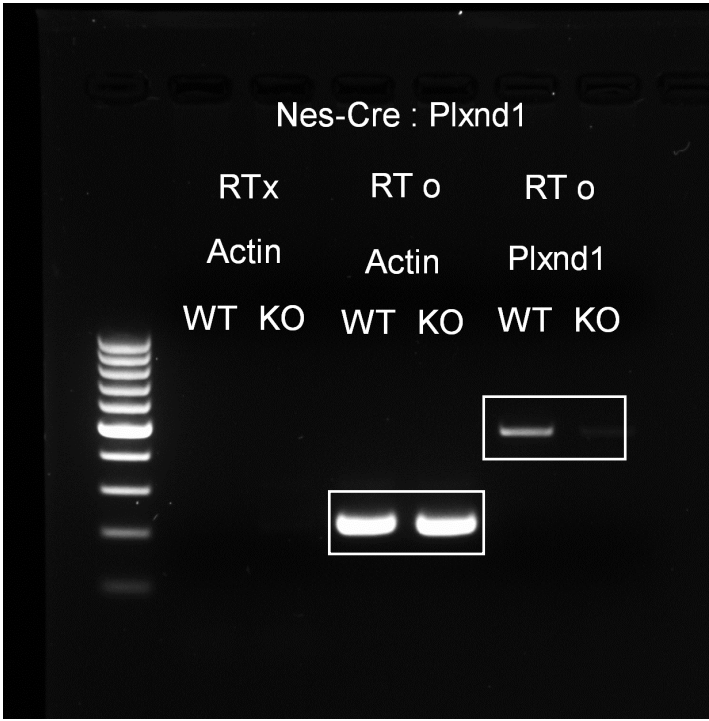

Supplement: fig1-figsupp1-data1 [file elife-96891-fig1-figsupp1-data1-v2.zip]

Supplementary Figure 2 – source data 1 (panel C)

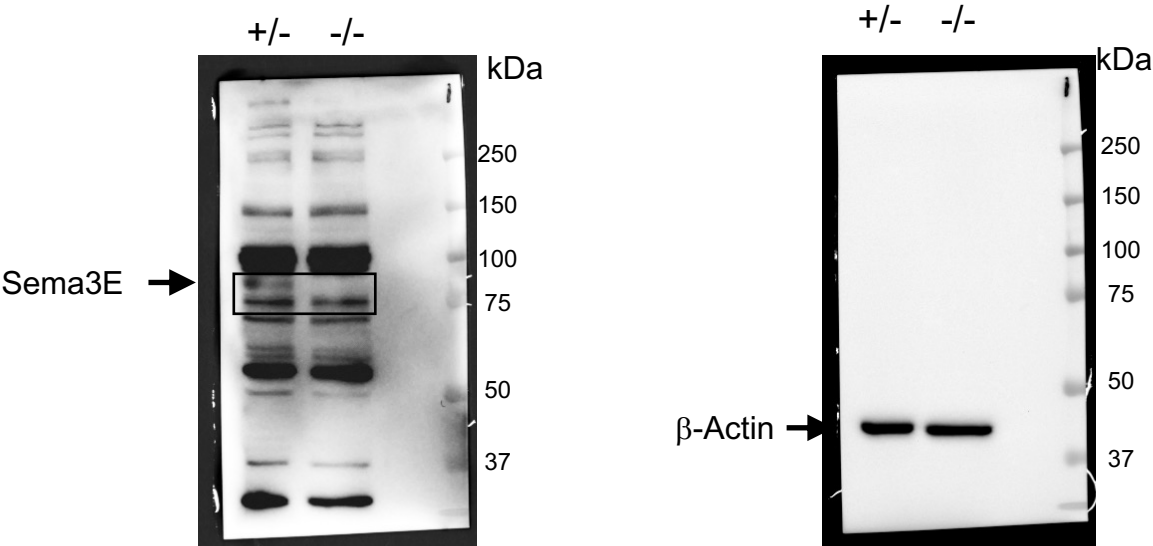

Supplement: fig1-figsupp2-data1 [file elife-96891-fig1-figsupp2-data1-v2.zip]

Figure 2 – source data 1 (panel A)

2A

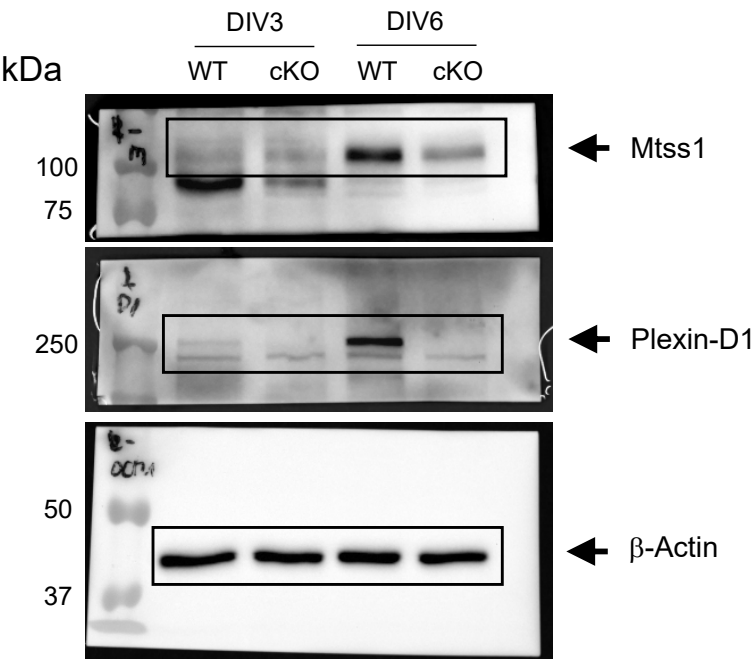

Supplement: fig2-data1 [file elife-96891-fig2-data1-v2.zip]

Figure 2 – source data 1 (panel G)

2G

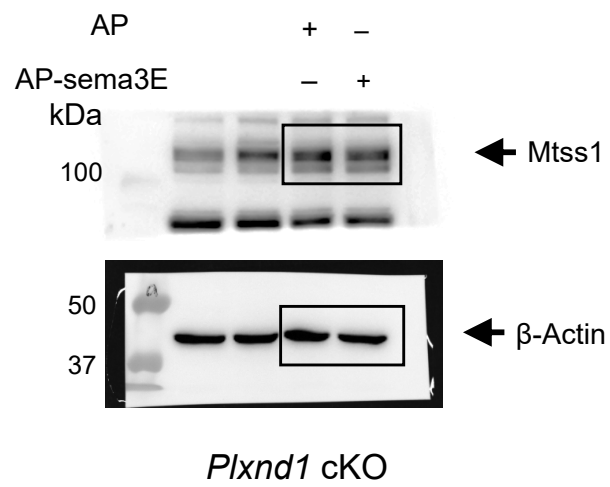

Supplement: fig2-data1 [file elife-96891-fig2-data1-v2.zip]

Figure 2 – source data 1 (panel N)

2N

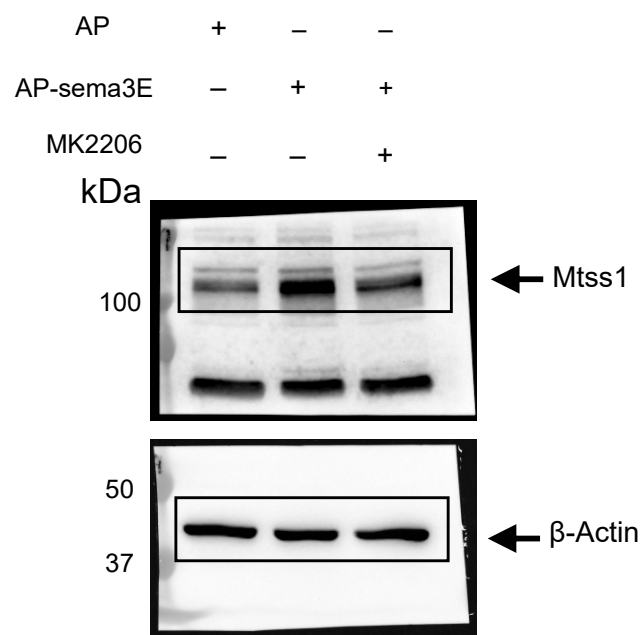

Supplement: fig2-data1 [file elife-96891-fig2-data1-v2.zip]

Figure 2 – source data 1 (panel C)

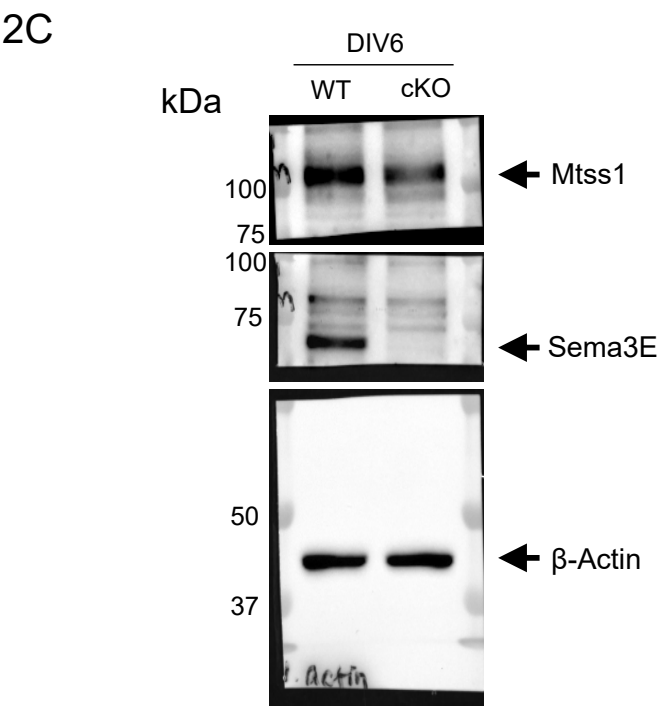

Supplement: fig2-data1 [file elife-96891-fig2-data1-v2.zip]

Figure 2 – source data 1 (panel J)

2J

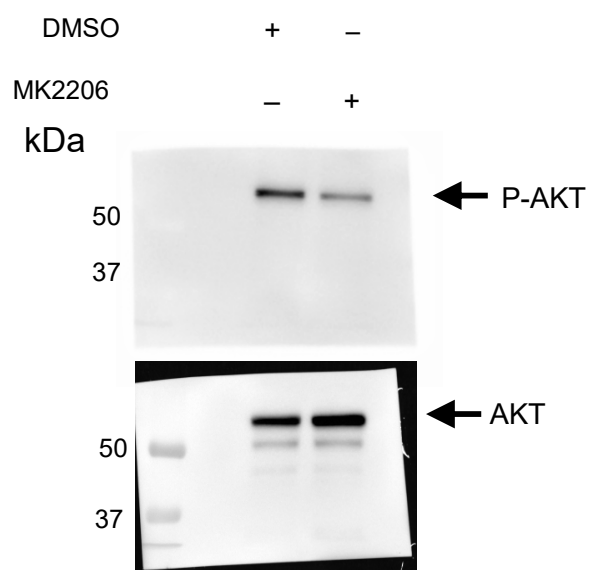

Supplement: fig2-data1 [file elife-96891-fig2-data1-v2.zip]

Figure 2 – source data 1 (panel K)

2K

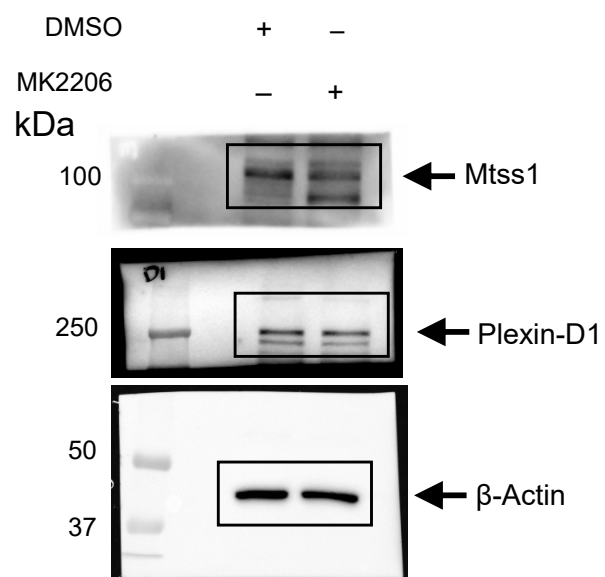

Supplement: fig2-data1 [file elife-96891-fig2-data1-v2.zip]

Figure 2 – source data 1 (panel F)

2F

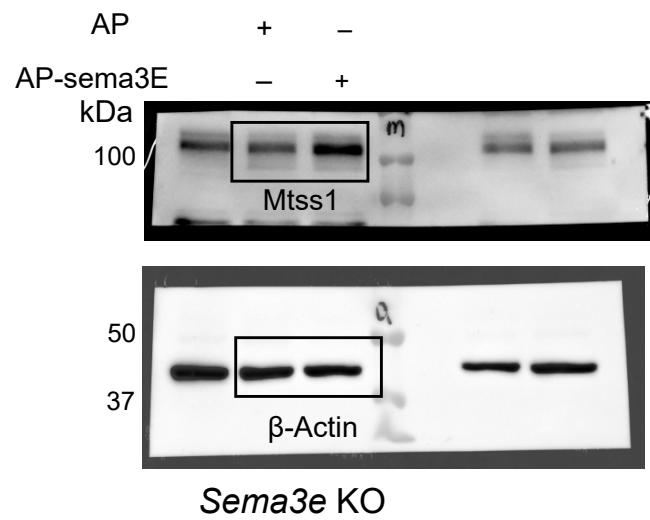

Supplement: fig2-data1 [file elife-96891-fig2-data1-v2.zip]

Supplementary Figure 3 – source data 1 (panel A)

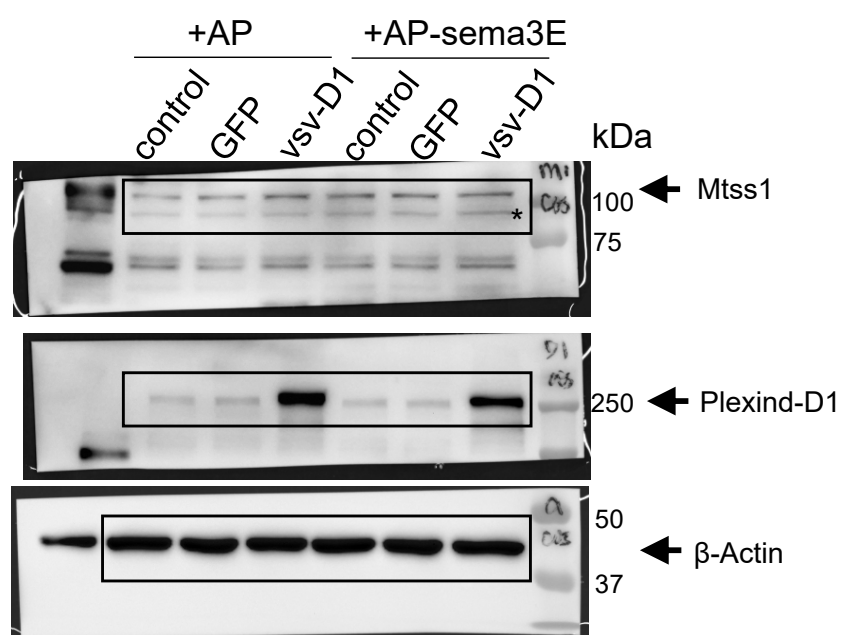

Supplement: fig3-figsupp1-data1 [file elife-96891-fig3-figsupp1-data1-v2.zip]

Figure 4 – source data 1 (panel B)

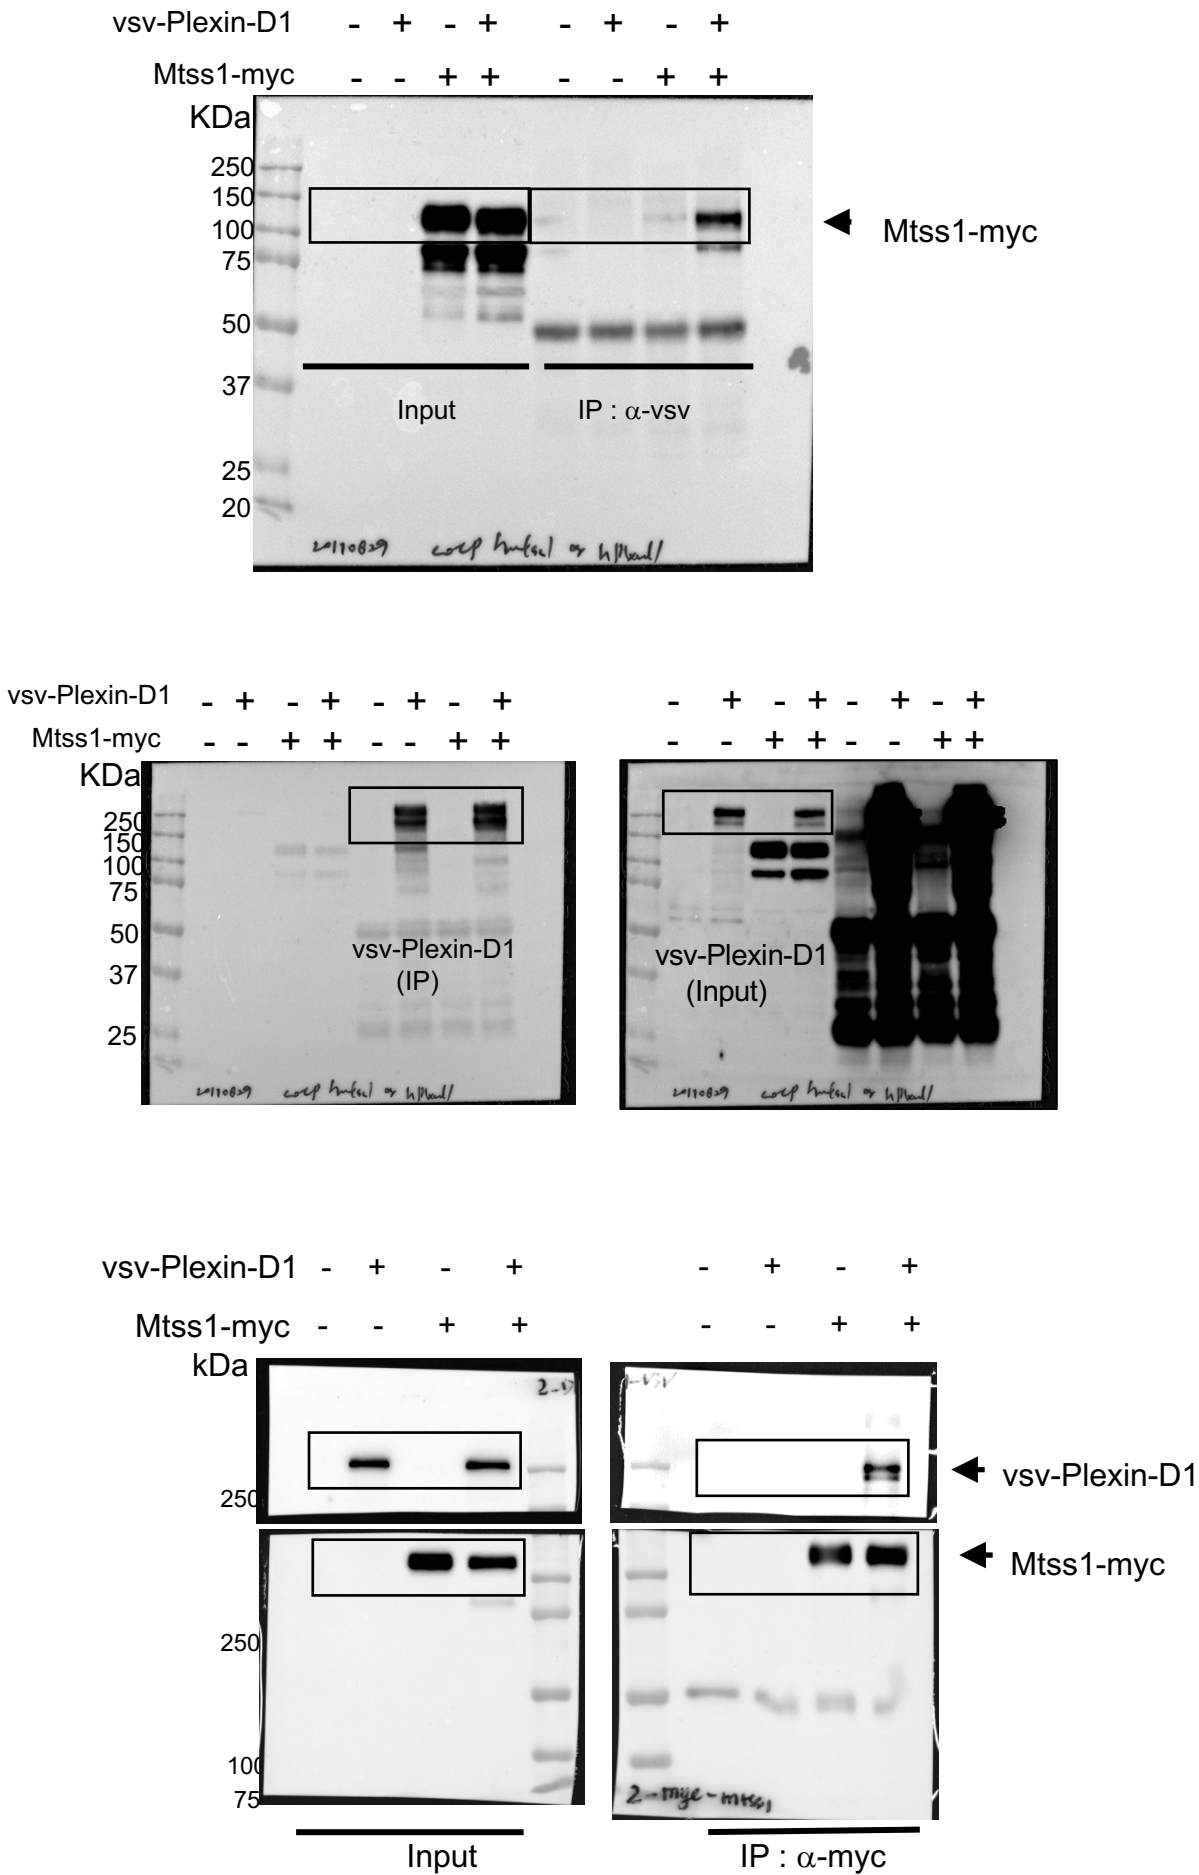

Supplement: fig4-data1 [file elife-96891-fig4-data1-v2.zip]

Figure 4 – source data 1 (panel G)

|               |   |   |   |   |   |
|---------------|---|---|---|---|---|
| Plexin-D1-ICD | - | + | - | + | + |
| Mtss1-IBAR    | + | - | + | - | + |

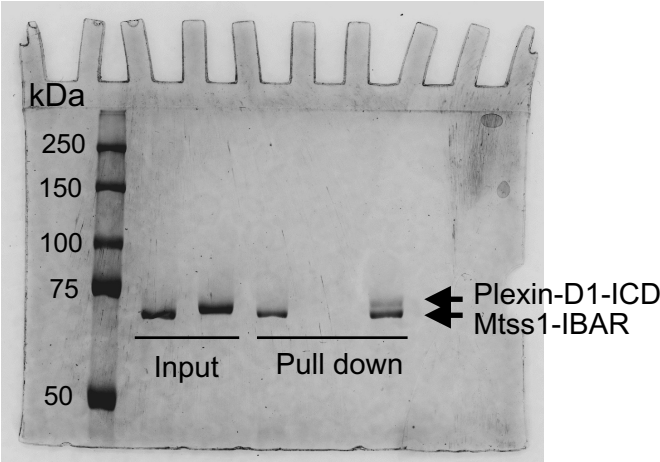

Supplement: fig4-data1 [file elife-96891-fig4-data1-v2.zip]

Figure 4 – source data 1 (panel E)

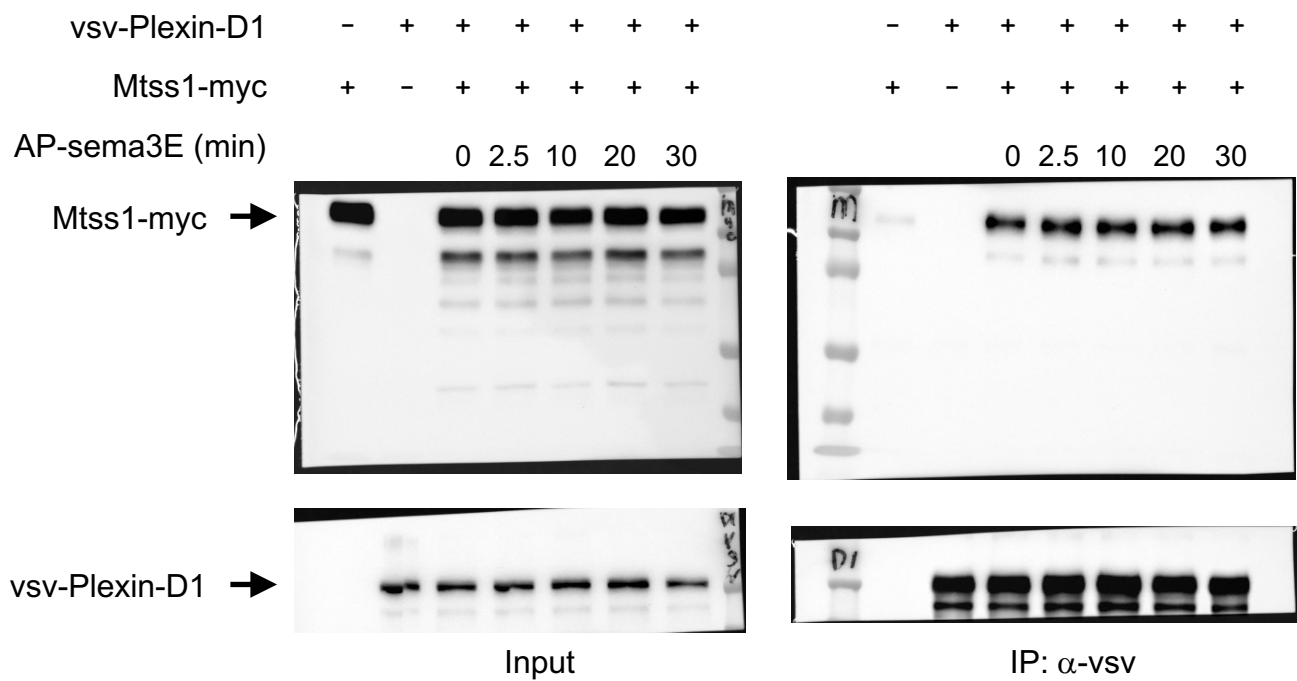

Supplement: fig4-data1 [file elife-96891-fig4-data1-v2.zip]

Figure 4 – source data 1 (panel D)

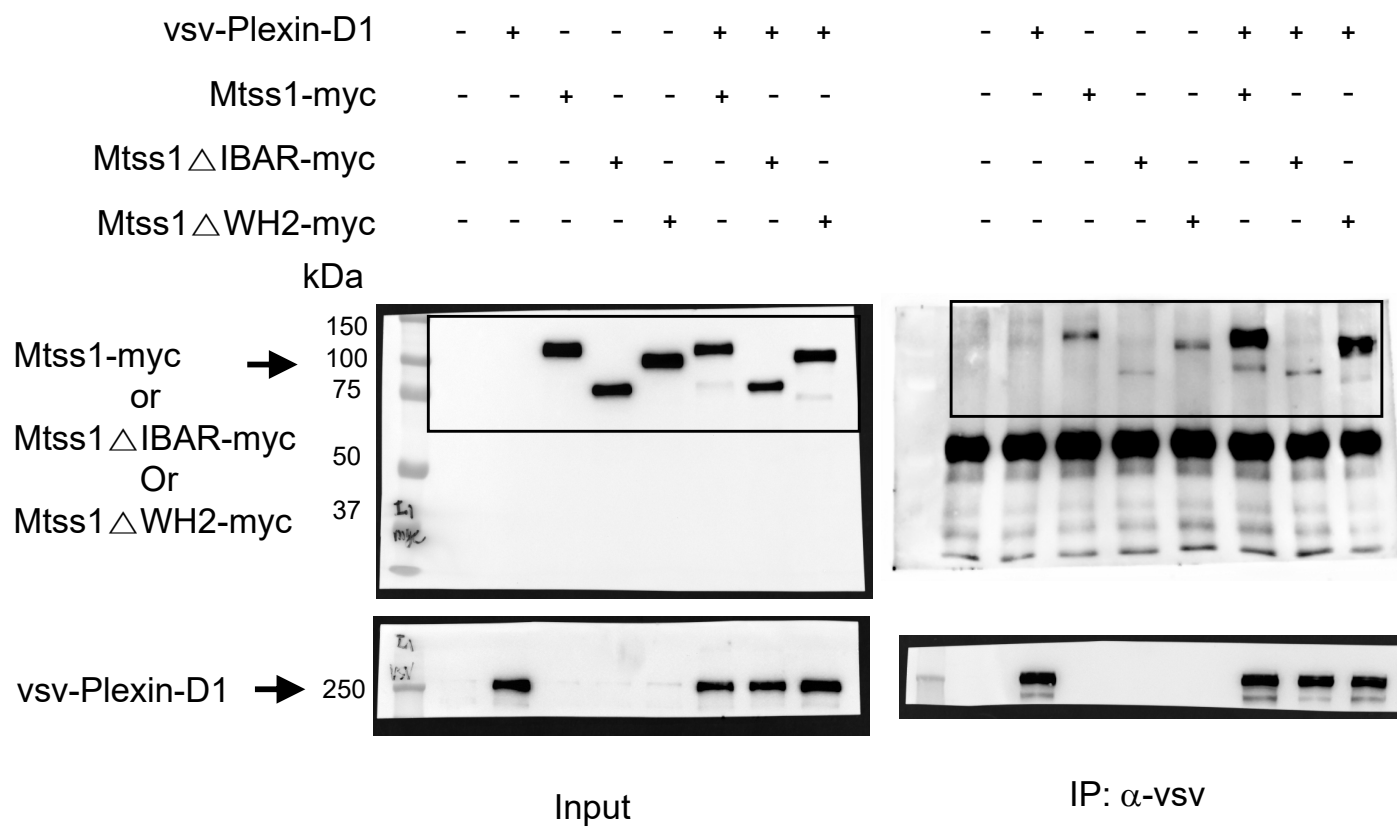

Supplement: fig4-data1 [file elife-96891-fig4-data1-v2.zip]

Figure 4 – source data 1 (panel C)

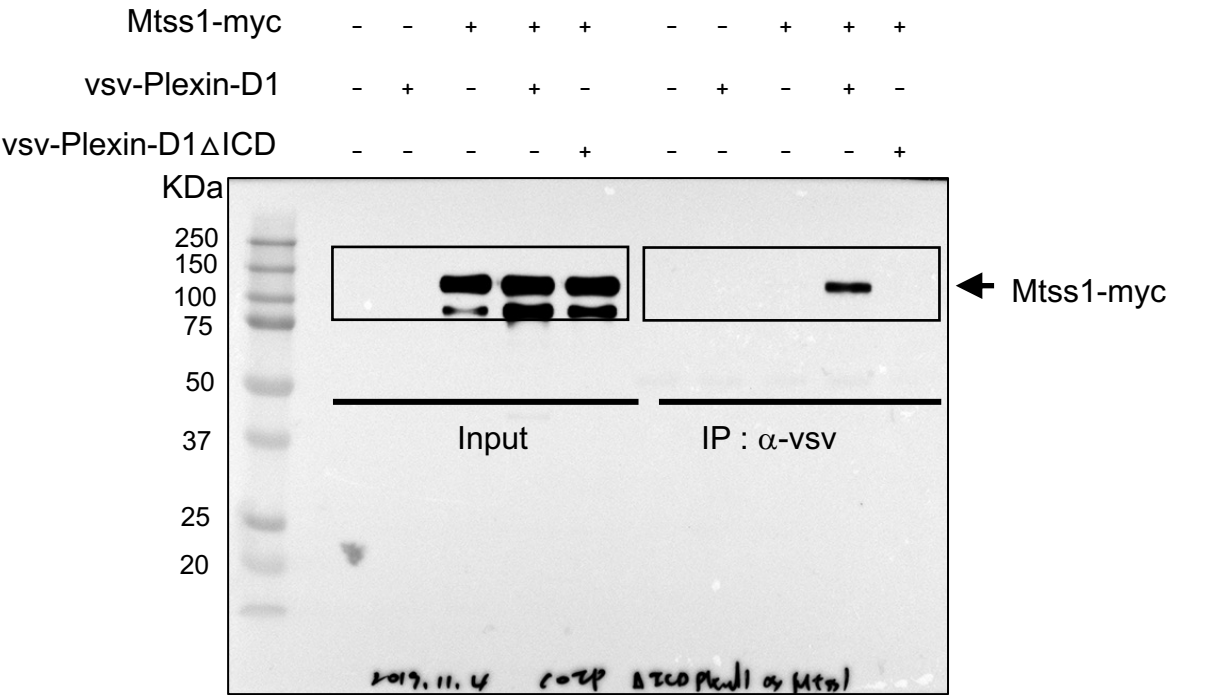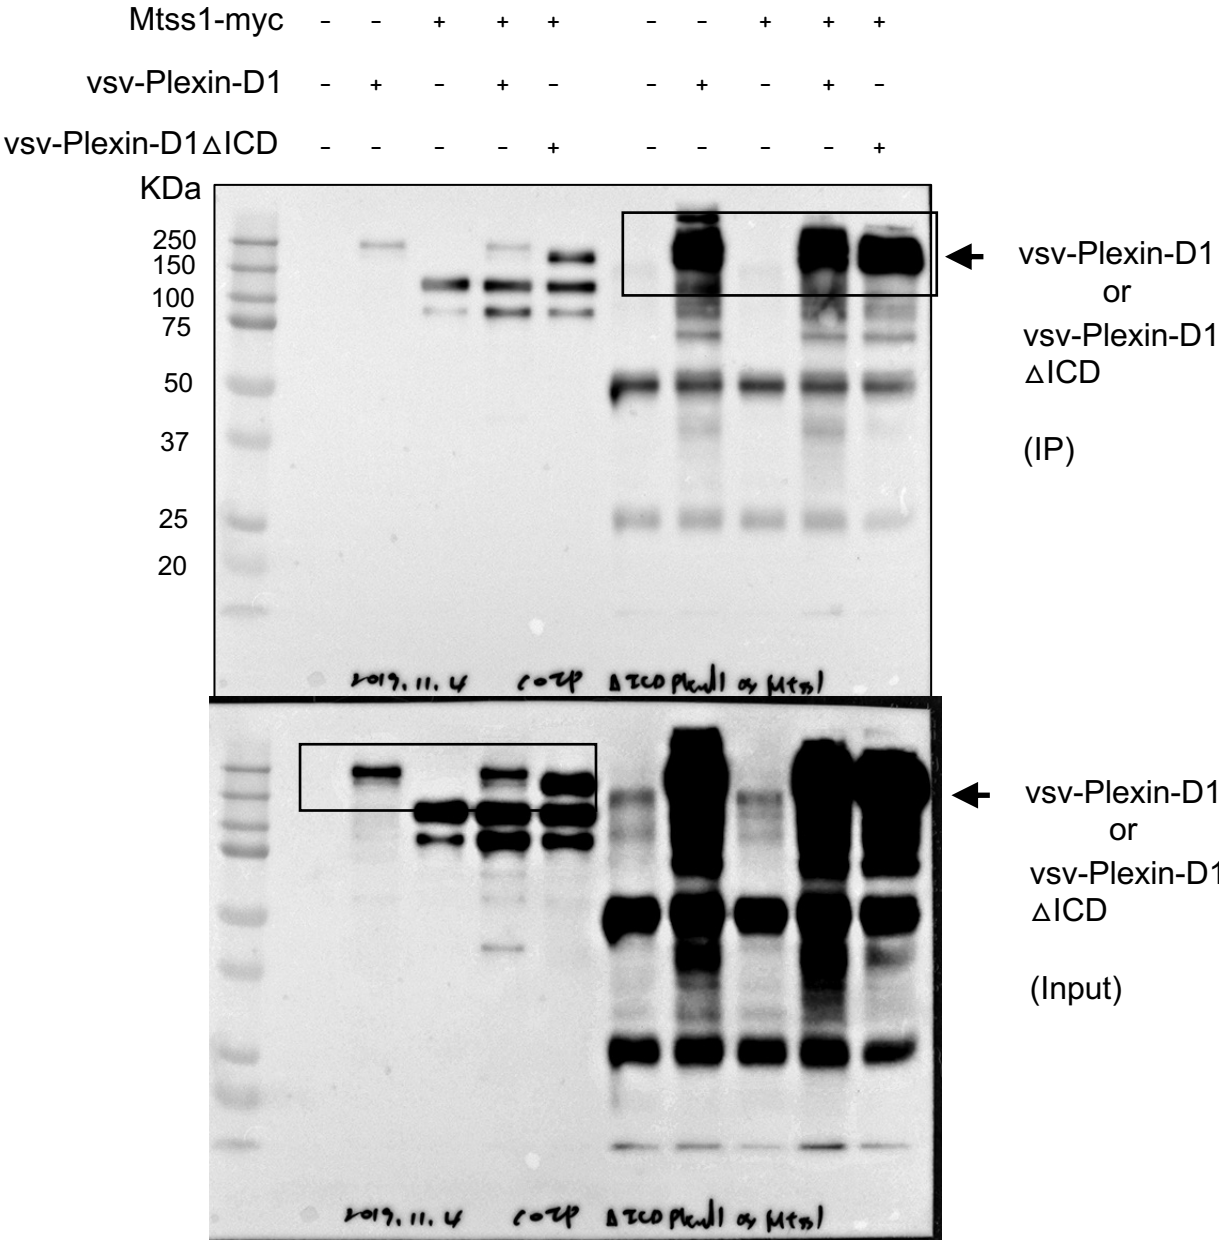

Supplement: fig4-data1 [file elife-96891-fig4-data1-v2.zip]

Supplementary Figure 4 – source data 1 (panel E)

E

|               |   |   |   |   |   |   |   |   |   |   |   |   |
|---------------|---|---|---|---|---|---|---|---|---|---|---|---|
| vsv-Plexin-B3 | - | - | + | + | - | - | + | + | - | - | + | + |
| Mtss1-myc     | - | + | - | + | - | + | - | + | - | + | - | + |

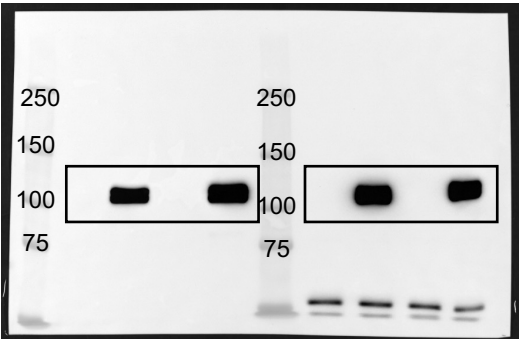

Mtss1-myc

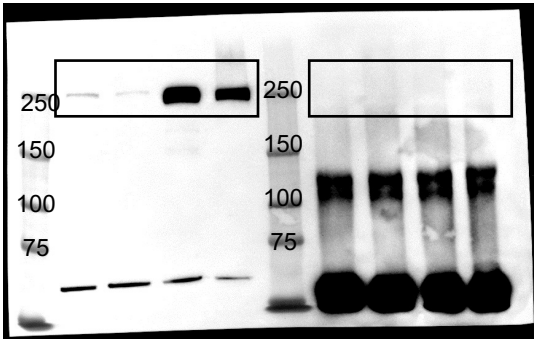

vsv-Plexin-B3

Supplement: fig4-figsupp1-data1 [file elife-96891-fig4-figsupp1-data1-v2.zip]

Supplementary Figure 4 – source data 1 (panel B)

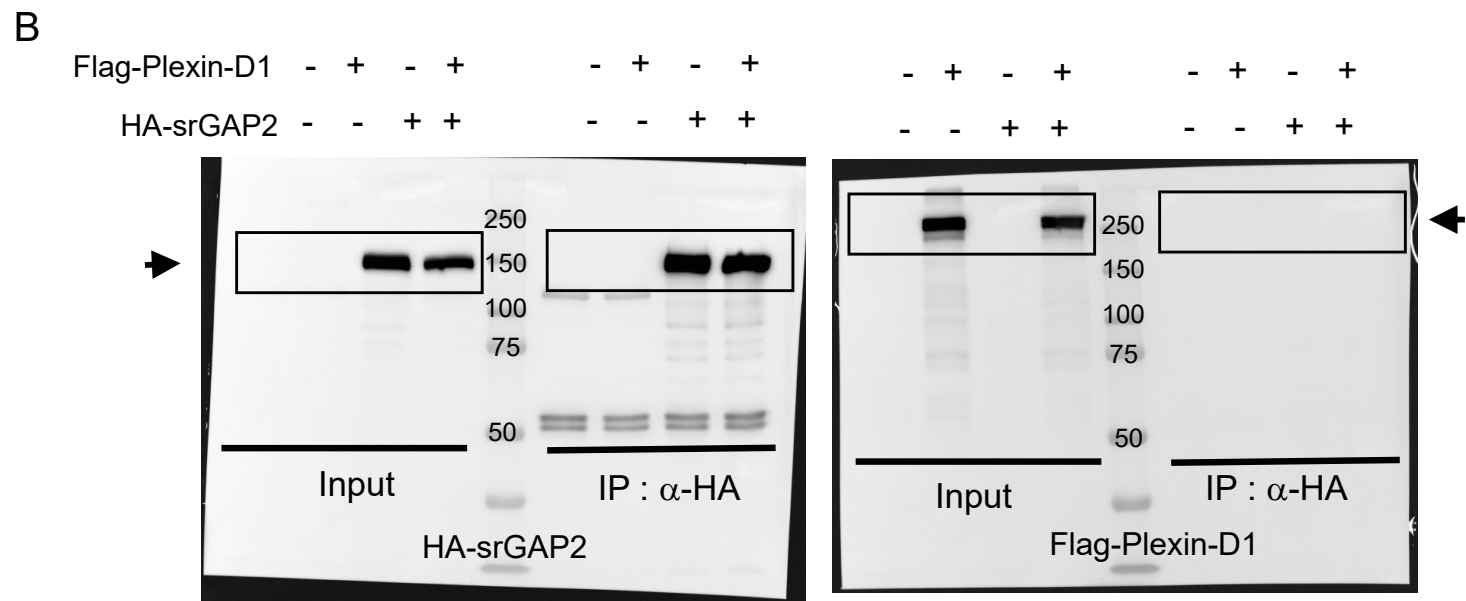

Supplement: fig4-figsupp1-data1 [file elife-96891-fig4-figsupp1-data1-v2.zip]

Supplementary Figure 4 – source data 1 (panel C)

C

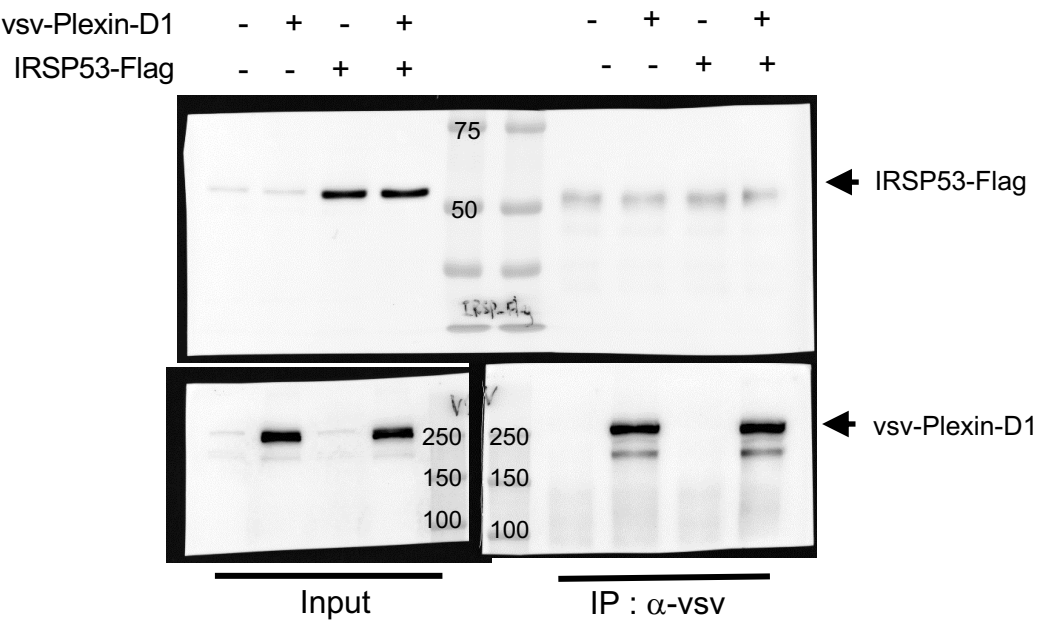

Supplement: fig4-figsupp1-data1 [file elife-96891-fig4-figsupp1-data1-v2.zip]

Supplementary Figure 4 – source data 1 (panel D)

D

|               |   |   |   |   |   |   |   |   |  |   |   |   |   |  |   |   |   |   |
|---------------|---|---|---|---|---|---|---|---|--|---|---|---|---|--|---|---|---|---|
| vsv-Plexin-B2 | - | - | + | + | - | - | + | + |  | - | - | + | + |  | - | - | + | + |
| Mtss1-myc     | - | + | - | + | - | + | - | + |  | - | + | - | + |  | - | + | - | + |

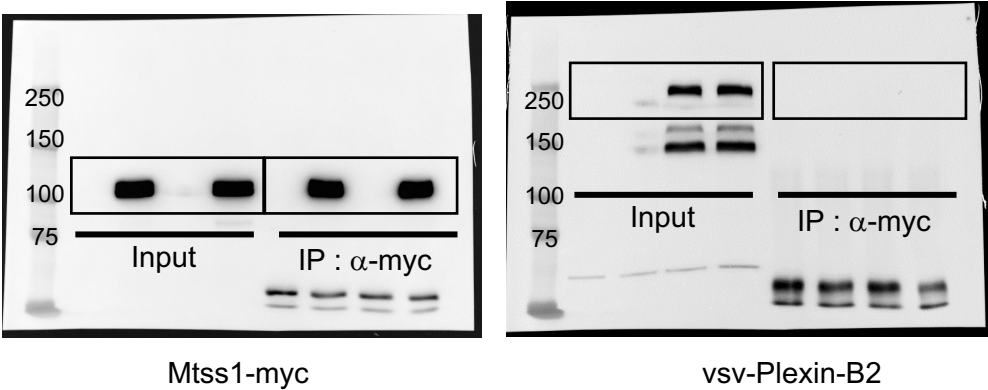

Supplement: fig4-figsupp1-data1 [file elife-96891-fig4-figsupp1-data1-v2.zip]

Supplementary Figure 4 – source data 1 (panel A)

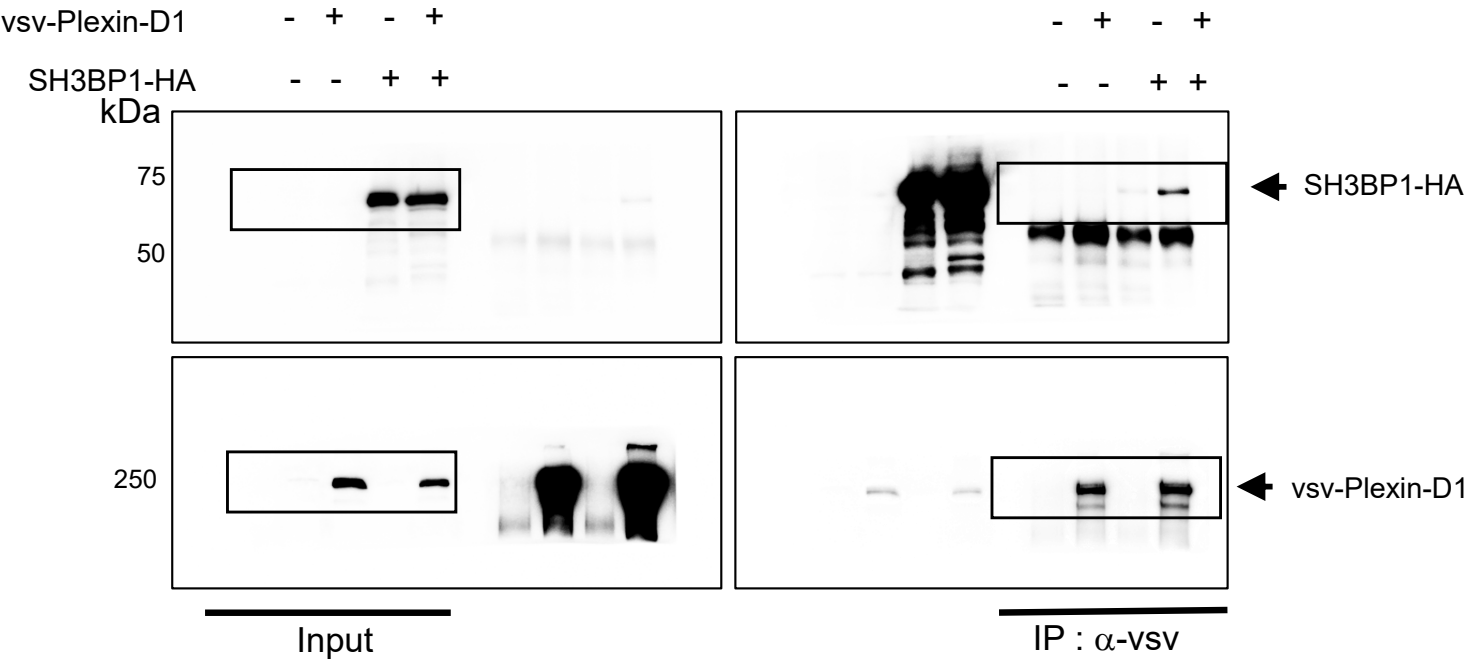

Supplement: fig4-figsupp1-data1 [file elife-96891-fig4-figsupp1-data1-v2.zip]

Supplementary Figure 5 – source data 1 (panel C)

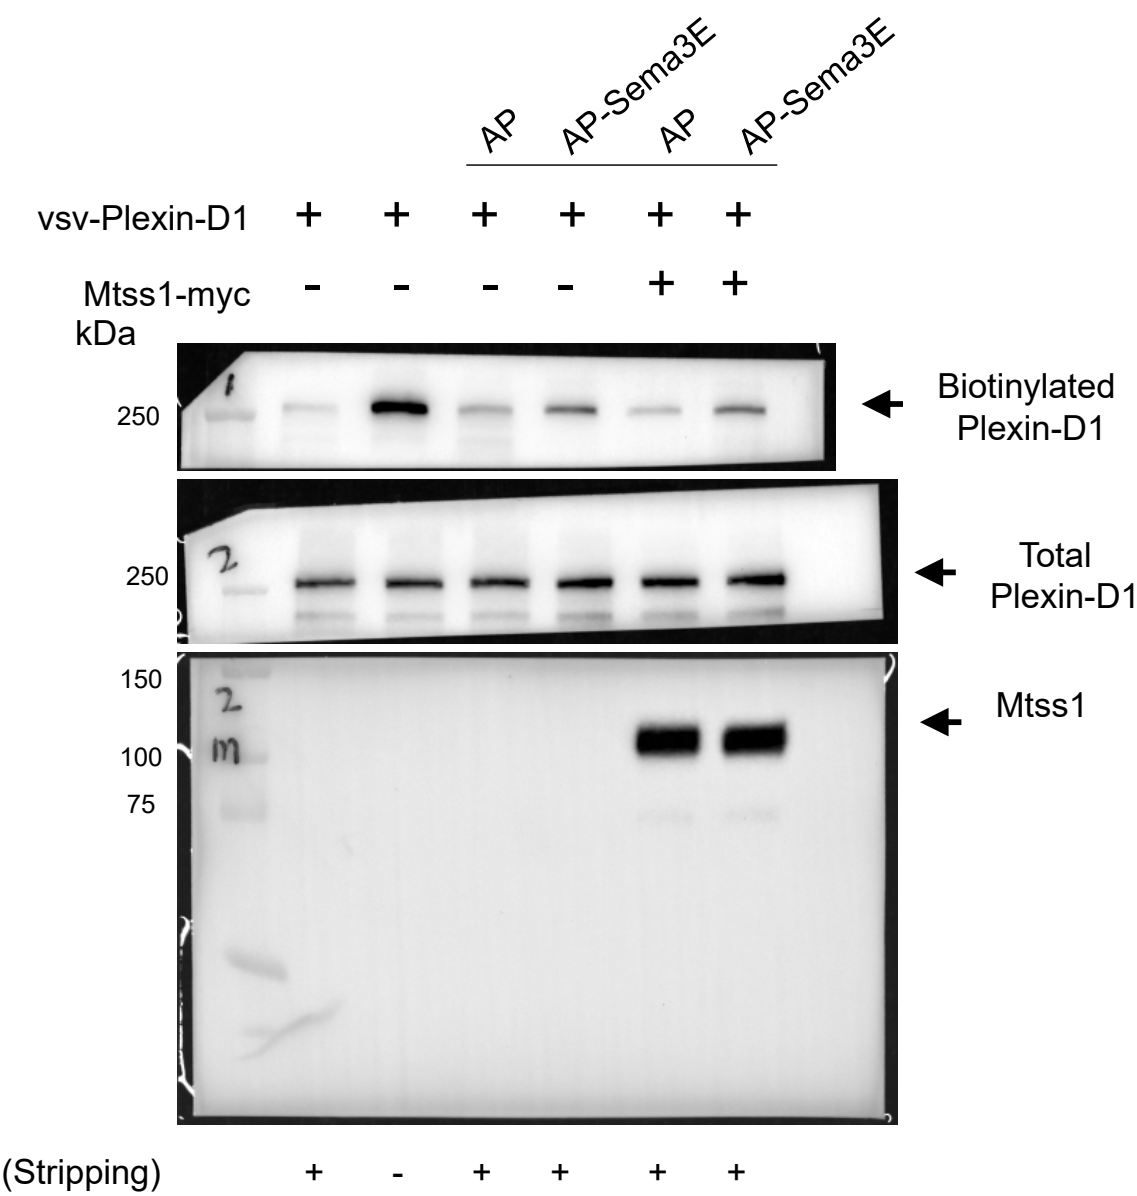

Supplement: fig5-figsupp1-data1 [file elife-96891-fig5-figsupp1-data1-v2.zip]

Supplementary Figure 5 – source data 1 (panel A)

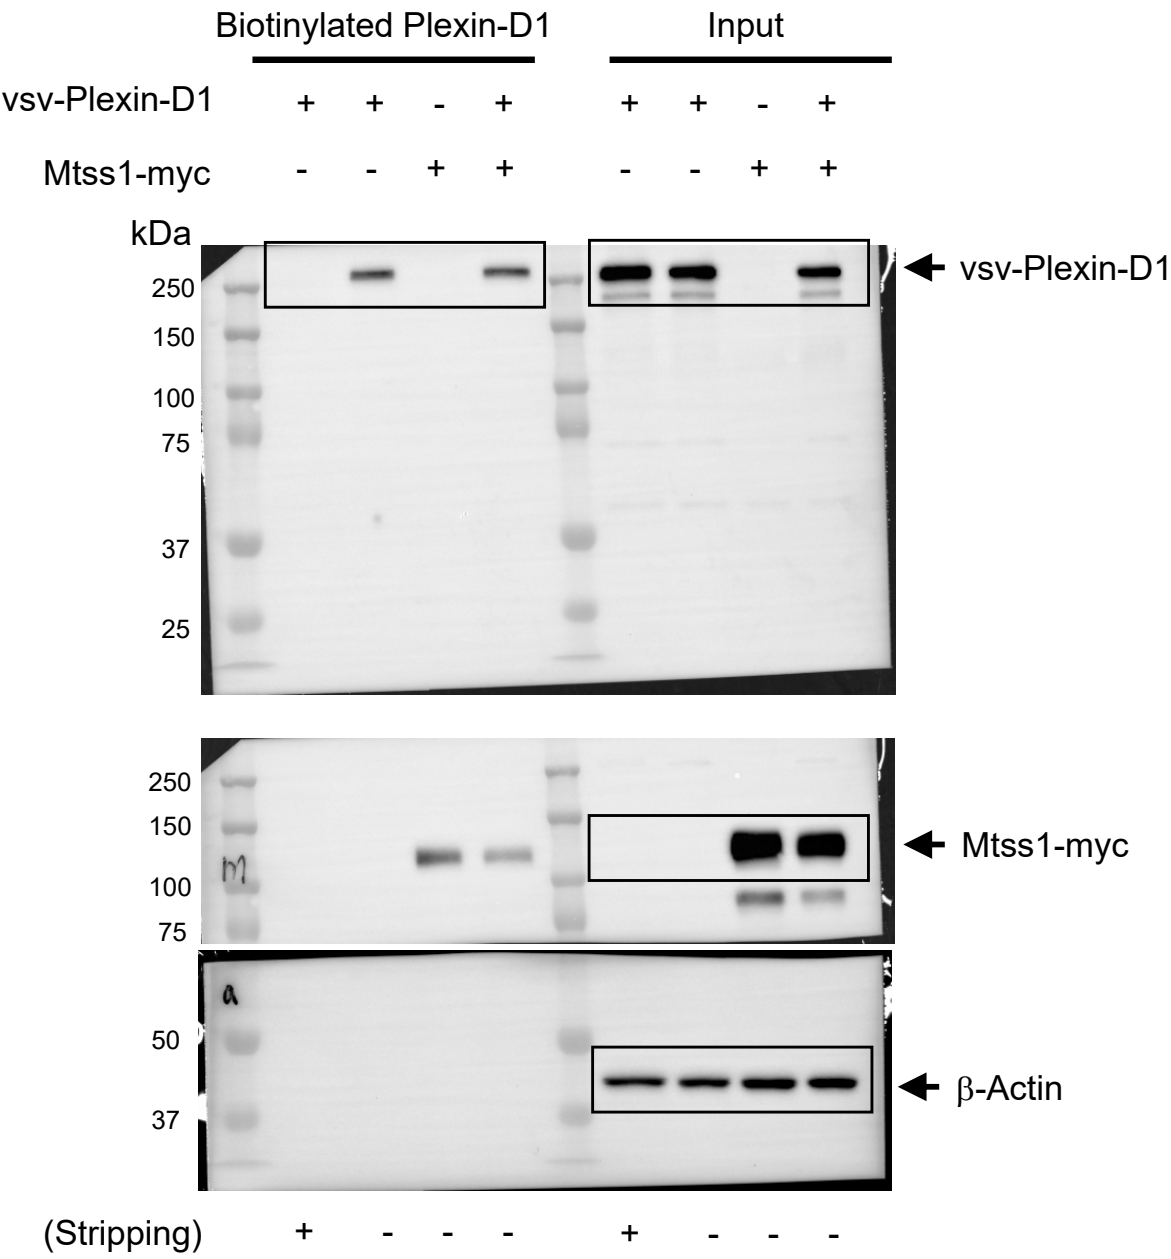

Supplement: fig5-figsupp1-data1 [file elife-96891-fig5-figsupp1-data1-v2.zip]

Supplementary Figure 9 – source data 1 (panel F)

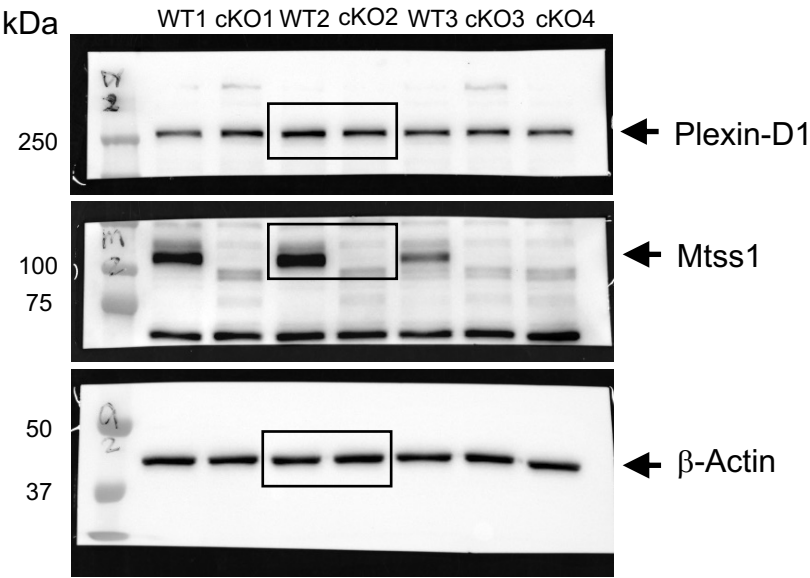

Supplement: fig7-figsupp3-data1 [file Figure S9_labelled_S9F.pdf › Figure 7_supplementary Figure 9_source data 1/Figure S9_labelled_S9F.pdf]

Supplementary Figure 9 – source data 1 (panel H)

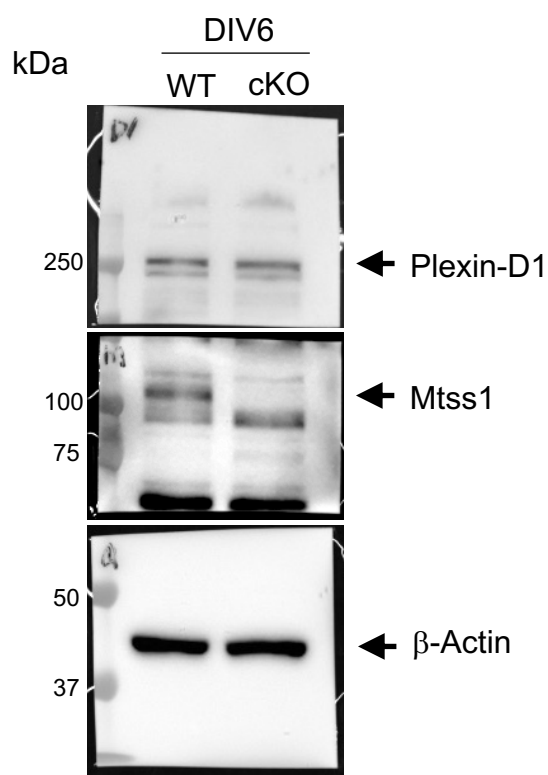

Supplement: fig7-figsupp3-data1 [file Figure S9_labelled_S9H.pdf › Figure 7_supplementary Figure 9_source data 1/Figure S9_labelled_S9H.pdf]

Supplementary Figure 11 – source data 1 (panel C)

HUVEC

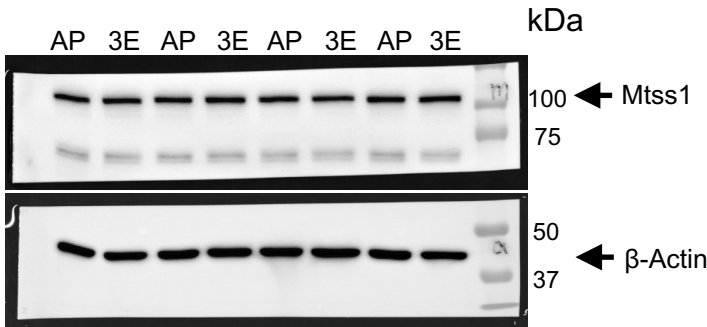

HCMEC

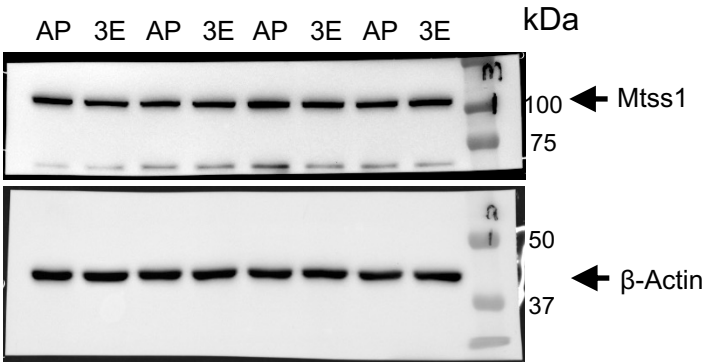

\*

Supplement: fig8-figsupp1-data1 [file elife-96891-fig8-figsupp1-data1-v2.zip]
